# Supplementary material for: Social Relationship Quality Among Patients With Chronic Pain: A Population-Based Sample
Source: PubMed Central journal article supplement — J Patient Exp. 2019 Aug 7;7(3):316–23. doi: 10.1177/2374373519862934 (PMC7410145; doi:10.1177/2374373519862934), 2019-08-07
Supplement: Survey_Tool_Appendix.pdf [file Survey_Tool_Appendix.pdf]

# Appendix 1. Survey Instrument

---

Start of Block: Default Question Block

## Health Survey

---

I would rate my health to be...

- Very good (1)
  - Good (2)
  - Average (3)
  - Fair (4)
  - Poor (5)
- 

For the next set of questions, please read each statement and then decide how much each applies to you in the past month.

---

## EMOTIONAL SUPPORT

**In the past month, please rate how often:**

|                                                                                | Never<br>(1)          | Rarely<br>(2)         | Sometimes<br>(3)      | Usually<br>(4)        | Always<br>(5)         |
|--------------------------------------------------------------------------------|-----------------------|-----------------------|-----------------------|-----------------------|-----------------------|
| I have someone who understands my problems (1)                                 | <input type="radio"/> |
| I have someone who will listen to me when I need to talk (2)                   | <input type="radio"/> |
| I feel there are people I can talk to if I am upset (3)                        | <input type="radio"/> |
| I have someone to talk with when I have a bad day (4)                          | <input type="radio"/> |
| I have someone I trust to talk with about my problems (5)                      | <input type="radio"/> |
| I have someone I trust to talk with about my feelings (6)                      | <input type="radio"/> |
| I can get helpful advice from others when dealing with a problem (7)           | <input type="radio"/> |
| I have someone to turn to for suggestions about how to deal with a problem (8) | <input type="radio"/> |

## INSTRUMENTAL SUPPORT

**In the past month, please rate how often:**

|                                                                       | Never<br>(1)          | Rarely<br>(2)         | Sometimes<br>(3)      | Usually<br>(4)        | Always (5)            |
|-----------------------------------------------------------------------|-----------------------|-----------------------|-----------------------|-----------------------|-----------------------|
| Someone is around to make my meals if I am unable to do it myself (1) | <input type="radio"/> |
| I have someone to take me shopping if I need it (2)                   | <input type="radio"/> |
| I have someone to help me if I'm sick in bed (3)                      | <input type="radio"/> |
| I have someone to pick up medicine for me if I need it (4)            | <input type="radio"/> |
| I have someone to take me to the doctor if I need it (5)              | <input type="radio"/> |
| There is someone around to help me if I need it (6)                   | <input type="radio"/> |
| I can find someone to drive me places if I need it (7)                | <input type="radio"/> |
| I can get help cleaning up around my home if I need it (8)            | <input type="radio"/> |

---

Page Break

## FRIENDSHIP

**In the past month, please rate how often:**

|                                                             | Never (1)             | Rarely (2)            | Sometimes (3)         | Usually (4)           | Always (5)            |
|-------------------------------------------------------------|-----------------------|-----------------------|-----------------------|-----------------------|-----------------------|
| I get invited to go out and do things with other people (1) | <input type="radio"/> |
| I have friends I get together with to relax (2)             | <input type="radio"/> |
| There are people around with whom to have fun (3)           | <input type="radio"/> |
| I can find a friend when I need one (4)                     | <input type="radio"/> |
| I feel like I have lots of friends (5)                      | <input type="radio"/> |
| I have friends who will have lunch with me when I want (6)  | <input type="radio"/> |
| I feel close to my friends (7)                              | <input type="radio"/> |
| I feel like I'm part of a group of friends (8)              | <input type="radio"/> |

## LONELINESS

**In the past month, please rate how often:**

|                                                | Never (1)             | Rarely (2)            | Sometimes<br>(3)      | Usually (4)           | Always (5)            |
|------------------------------------------------|-----------------------|-----------------------|-----------------------|-----------------------|-----------------------|
| I feel alone and apart from others (1)         | <input type="radio"/> |
| I feel left out (2)                            | <input type="radio"/> |
| I feel like I am no longer close to anyone (3) | <input type="radio"/> |
| I feel alone (4)                               | <input type="radio"/> |
| I feel lonely (5)                              | <input type="radio"/> |

---

Page Break

## PERCEIVED REJECTION

**In the past month, please rate how often people in your life:**

|                                                          | Never (1)             | Rarely (2)            | Sometimes<br>(3)      | Usually (4)           | Always (5)            |
|----------------------------------------------------------|-----------------------|-----------------------|-----------------------|-----------------------|-----------------------|
| Don't listen when I ask for help (1)                     | <input type="radio"/> |
| Act like my problems aren't that important (2)           | <input type="radio"/> |
| Let me down when I am counting on them (3)               | <input type="radio"/> |
| Act like they don't have time for me (4)                 | <input type="radio"/> |
| Act like they don't want to hear about my problems (5)   | <input type="radio"/> |
| Act like they don't care about me (6)                    | <input type="radio"/> |
| Act like they can't be bothered by me or my problems (7) | <input type="radio"/> |
| Avoid talking to me (8)                                  | <input type="radio"/> |

## PERCEIVED HOSTILITY

**In the past month**, please rate how often people in your life:

|                                   | Never (1)             | Rarely (2)            | Sometimes (3)         | Usually (4)           | Always (5)            |
|-----------------------------------|-----------------------|-----------------------|-----------------------|-----------------------|-----------------------|
| Argue with me (1)                 | <input type="radio"/> |
| Act in an angry way toward me (2) | <input type="radio"/> |
| Criticize the way I do things (3) | <input type="radio"/> |
| Yell at me (4)                    | <input type="radio"/> |
| Get mad at me (5)                 | <input type="radio"/> |
| Blame me when things go wrong (6) | <input type="radio"/> |
| Act nasty to me (7)               | <input type="radio"/> |
| Tease me in a mean way (8)        | <input type="radio"/> |

---

Questions above: Cyranowski JM, Zill N, Bode R, et al. Assessing social support, companionship, and distress: National Institute of Health (NIH) Toolbox Adult Social Relationship Scales. *Health Psychol.* 2013;32(3):293-301.

---

Page Break

**Has a doctor or other health care provider ever told you that you have:**

|                                   | Yes (1)               | No (2)                | I don't know (3)      |
|-----------------------------------|-----------------------|-----------------------|-----------------------|
| Anxiety (1)                       | <input type="radio"/> | <input type="radio"/> | <input type="radio"/> |
| Depression (2)                    | <input type="radio"/> | <input type="radio"/> | <input type="radio"/> |
| Bipolar disorder (3)              | <input type="radio"/> | <input type="radio"/> | <input type="radio"/> |
| Schizophrenia (4)                 | <input type="radio"/> | <input type="radio"/> | <input type="radio"/> |
| Personality disorder (5)          | <input type="radio"/> | <input type="radio"/> | <input type="radio"/> |
| Other Mental health condition (6) | <input type="radio"/> | <input type="radio"/> | <input type="radio"/> |

---

**Opioid Use:**

Next we would like to understand if you have had pain and have used pain medications, specifically opiate medicines (opioids). Opiate medicines ("opioids") include: tramadol, oxycodone, hydrocodone, codeine, morphine, hydromorphone, oxymorphone, fentanyl, methadone, buprenorphine.

**Please click below to see a complete list of opioids.**

Opioid List.pdf

**In the past year, did you use any opioids that were prescribed to you by a health care provider?**

- Yes (1)
  - No (2)
  - Don't know / Not sure (3)
-



---

*Display This Question:*

*If In the past year, did you use any opioids that were prescribed to you by a health care provider? = Yes*

**This question asks about pain. SHORT-TERM PAIN is from an injury or surgery, and is expected to resolve after a few days. LONG-TERM PAIN lasts weeks to months and may never go away.**

**The last time you used an opioid that was prescribed for you by a health care provider, was it to relieve SHORT-TERM pain, or LONG-TERM PAIN, or both?**

- Short-term pain (1)
- Long-term pain (2)
- Both (3)
- Don't know/Not sure (4)

Page Break

---

## DEMOGRAPHICS

---

**Current Age:**

\_\_\_\_\_ Age (1)

---

**Gender:**

Male (1)

Female (2)

---

**Race:** (Mark all that apply.)

Asian (1)

White (2)

Black/African American (3)

Hawaiian/Pacific Islander (4)

American Indian/Alaskan Native (5)

Other, please specify: (6) \_\_\_\_\_

---

**Ethnicity:**

Hispanic/Latino (1)

Not Hispanic/Latino (2)

---

Page Break \_\_\_\_\_

**Marital Status:**

- Married/Committed Relationship (1)
  - Separated/Divorced (2)
  - Widowed (3)
  - Never Married (4)
  - Refused (5)
- 

**Education:**

- 8th grade or less (1)
  - Some high school (2)
  - High school diploma/GED (3)
  - Some college/Associate's degree (4)
  - Bachelor's degree (5)
  - Master's degree (6)
  - Doctoral degree/Professional degree (7)
- 

**Insurance Status:**

- Public insurance: Medicare, Medicaid, Veteran's benefits (1)
  - Private insurance: Through work, Purchased on market (2)
  - No health insurance (3)
  - Other, please specify: (4) \_\_\_\_\_
-

**Current working status:**

Working (1)

Not Working (2)

End of Block: Default Question Block

---

Start of Block: Block 1

**Religious Denomination:**

Christian (1)

Islam (2)

Jewish (3)

Buddhist (4)

Mormon (5)

Hindu (6)

Not religious (7)

Other, please specify: (8) \_\_\_\_\_

---

**Thank you for your time!**

**Please click SUBMIT to record your responses.**

End of Block: Block 1

---
